# Supplementary material for: Incorporating functional priors improves polygenic prediction accuracy in UK Biobank and 23andMe data sets
Source: PubMed Central journal article supplement (PMC8523709; doi:10.1038/s41467-021-25171-9), 2021-10-18
Supplement: 41467_2021_25171_MOESM1_ESM.pdf [file 41467_2021_25171_MOESM1_ESM.pdf]

## Supplementary Information

## Supplementary Figures

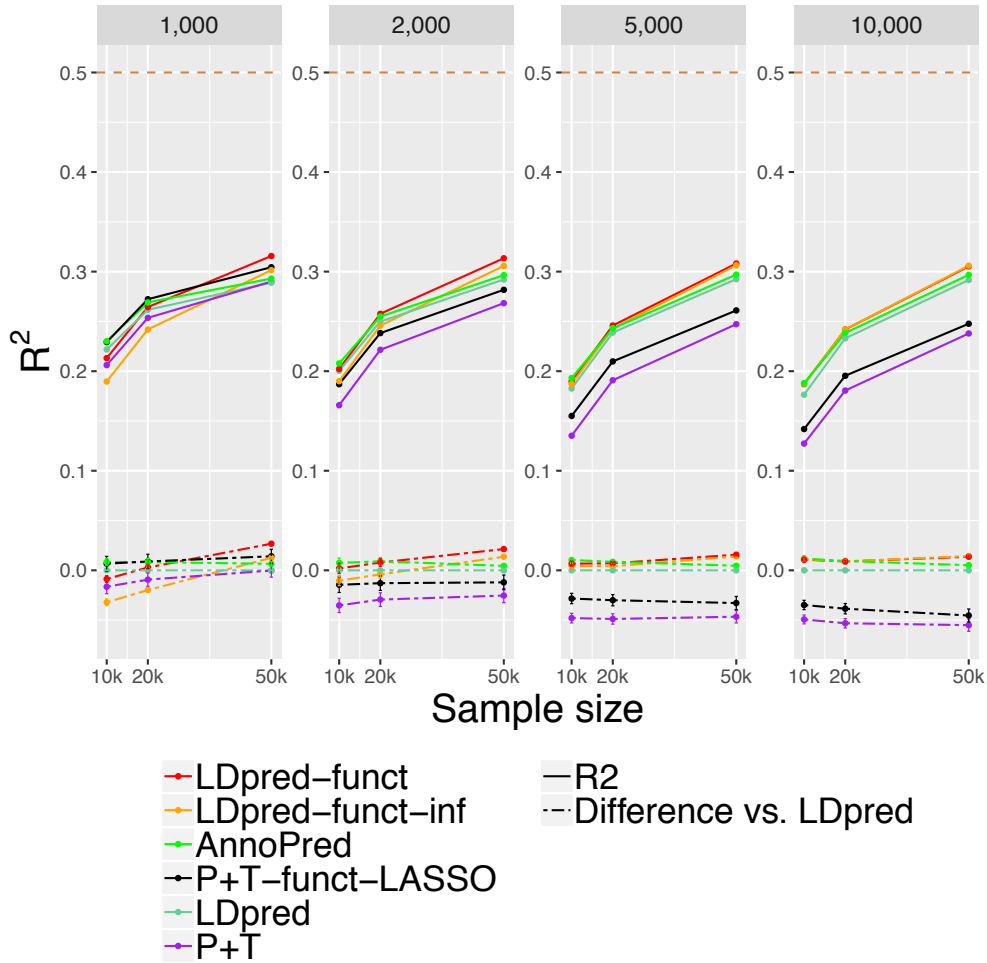

**Supplementary Figure 1: Accuracy of 6 polygenic prediction methods in simulations using UK Biobank genotypes, for 4 values of the number of causal variants.** We report results for P+T, LDpred, P+T-funct-LASSO, AnnoPred, LDpred-funct-inf and LDpred-funct in chromosome 1 simulations with 1,000 causal variants (very sparse architecture), 2,000 causal variants (sparse architecture), 5,000 causal variants (polygenic architecture) and 10,000 causal variants (very polygenic architecture). Results obtained in a validation set with  $n=7,585$  are averaged across independent 100 simulations. Top dashed line denotes simulated SNP-heritability of 0.5. Bottom dashed lines denote differences vs. LDpred; error bars represent 95% confidence intervals. Numerical results are reported in Supplementary Table 1 and Supplementary Table 2. Source data are provided as a Source Data file.

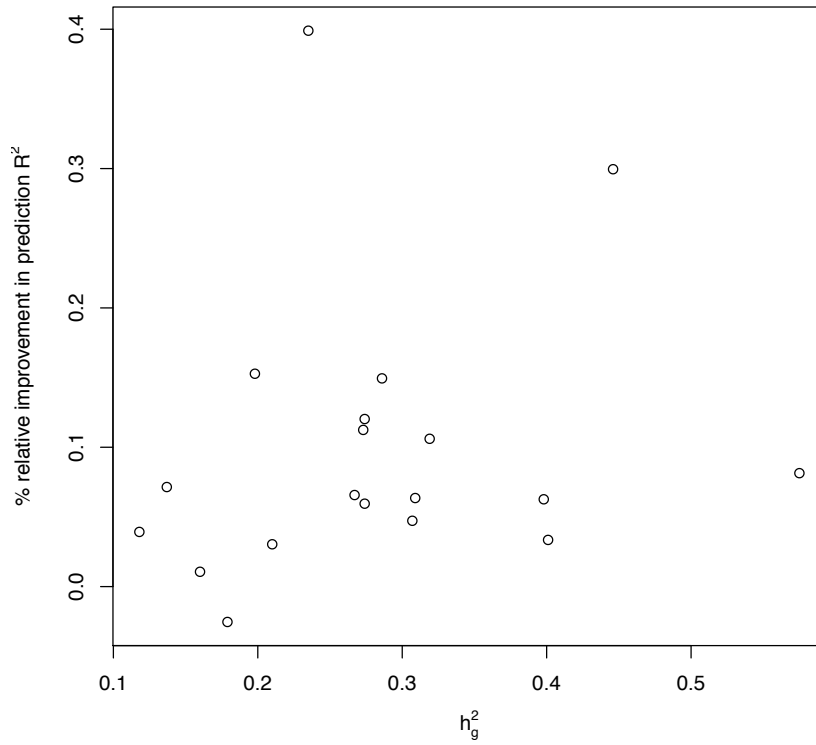

**Supplementary Figure 2: Relative improvement of LDpred-funct vs. LDpred as a function of  $h_g^2$ .** We plot relative improvement vs.  $h_g^2$  (measured on the observed scale for binary traits) for 19 UK Biobank traits; we excluded two sex-specific traits, age at menarche and balding type I. We observed a correlation of 0.186 across the 19 traits, which was non-significant ( $P = 0.4$  from two-sided t-test). Source data are provided as a Source Data file.

## Supplementary Tables

| # Causal variants | Model            | Training sample size          |                               |                               |
|-------------------|------------------|-------------------------------|-------------------------------|-------------------------------|
|                   |                  | 10,000                        | 20,000                        | 50,000                        |
|                   |                  | Average $R^2$ ( <i>s.e.</i> ) | Average $R^2$ ( <i>s.e.</i> ) | Average $R^2$ ( <i>s.e.</i> ) |
| 1,000             | P+T              | 0.2061 ( 0.0022)              | 0.2536 ( 0.0021)              | 0.2900 ( 0.0019)              |
|                   | LDpred           | 0.2218 ( 0.0024)              | 0.2616 ( 0.0021)              | 0.2889 ( 0.0018)              |
|                   | P+T-funct-LASSO  | 0.2292 ( 0.0024)              | 0.2723 ( 0.0024)              | 0.3044 ( 0.002)               |
|                   | AnnoPred         | 0.2300 ( 0.0025 )             | 0.2691 ( 0.0027 )             | 0.2930 ( 0.0019 )             |
|                   | LDpred-funct-inf | 0.1896 ( 0.0018)              | 0.2419 ( 0.0019)              | 0.3015 ( 0.0019)              |
|                   | LDpred-funct     | 0.2131 ( 0.002)               | 0.2644 ( 0.0021)              | 0.3157 ( 0.002)               |
| 2,000             | P+T              | 0.1658 ( 0.0022)              | 0.2215 ( 0.0026)              | 0.2683 ( 0.0029)              |
|                   | LDpred           | 0.2004 ( 0.0028)              | 0.2498 ( 0.0023)              | 0.2921 ( 0.0015)              |
|                   | P+T-funct-LASSO  | 0.1869 ( 0.0026)              | 0.2383 ( 0.0028)              | 0.2817 ( 0.0031)              |
|                   | AnnoPred         | 0.2078 ( 0.0018 )             | 0.2549 ( 0.0028 )             | 0.2964 ( 0.0016 )             |
|                   | LDpred-funct-inf | 0.1900 ( 0.0015)              | 0.2458 ( 0.0015)              | 0.3057 ( 0.0016)              |
|                   | LDpred-funct     | 0.2023 ( 0.0016)              | 0.2576 ( 0.0016)              | 0.3134 ( 0.0017)              |
| 5,000             | P+T              | 0.1352 ( 0.0016)              | 0.1909 ( 0.002)               | 0.2472 ( 0.0024)              |
|                   | LDpred           | 0.1826 ( 0.0017)              | 0.2388 ( 0.0013)              | 0.2924 ( 0.0013)              |
|                   | P+T-funct-LASSO  | 0.1550 ( 0.0018)              | 0.2098 ( 0.0021)              | 0.2610 ( 0.0026)              |
|                   | AnnoPred         | 0.1931 ( 0.0013 )             | 0.2429 ( 0.0021 )             | 0.2970 ( 0.0014 )             |
|                   | LDpred-funct-inf | 0.1872 ( 0.0012)              | 0.2430 ( 0.0013)              | 0.3063 ( 0.0014)              |
|                   | LDpred-funct     | 0.1895 ( 0.0012)              | 0.2458 ( 0.0013)              | 0.3081 ( 0.0014)              |
| 10,000            | P+T              | 0.1273 ( 0.0015)              | 0.1806 ( 0.002)               | 0.2379 ( 0.0024)              |
|                   | LDpred           | 0.1764 ( 0.0016)              | 0.2330 ( 0.0012)              | 0.2916 ( 0.0012)              |
|                   | P+T-funct-LASSO  | 0.1419 ( 0.0017)              | 0.1954 ( 0.0022)              | 0.2477 ( 0.0026)              |
|                   | AnnoPred         | 0.1880 ( 0.0013 )             | 0.2384 ( 0.0021 )             | 0.2967 ( 0.0013 )             |
|                   | LDpred-funct-inf | 0.1873 ( 0.0012)              | 0.2419 ( 0.0012)              | 0.3059 ( 0.0013)              |
|                   | LDpred-funct     | 0.1870 ( 0.0013)              | 0.2418 ( 0.0012)              | 0.3053 ( 0.0012)              |

**Supplementary Table 1: Accuracy of 6 polygenic prediction methods in simulations using UK Biobank genotypes, for 4 values of the number of causal variants.** We report results for P+T, LDpred, P+T-funct-LASSO, AnnoPred, LDpred-funct-inf and LDpred-funct in chromosome 1 simulations with 1,000 causal variants (very sparse architecture), 2,000 causal variants (sparse architecture), 5,000 causal variants (polygenic architecture) and 10,000 causal variants (very polygenic architecture). Results are averaged across 100 simulations. We report standard errors in parentheses. For SBayesR simulations at N=10K, we obtained average prediction  $R^2$  of 0.2754 ( 0.002 ), 0.2381 ( 0.001 ), 0.1983 ( 0.001 ) and 0.1827 ( 0.001 ) for 1,000, 2,000, 5,000 and 10,000 causal variants respectively. However, for all SBayesR simulations at N=20K and N=50K, we obtained average prediction  $R^2$  of 0.0005 (0.0001) and  $h_g^2 = 0.99$  in 100/100 simulations, perhaps because the algorithm failed to converge.

(a)

| # Causal variants | Model            | Training sample size        |                             |                             |
|-------------------|------------------|-----------------------------|-----------------------------|-----------------------------|
|                   |                  | 10,000                      | 20,000                      | 50,000                      |
|                   |                  | Diff. $R^2$ ( <i>s.e.</i> ) | Diff. $R^2$ ( <i>s.e.</i> ) | Diff. $R^2$ ( <i>s.e.</i> ) |
| 1,000             | P+T              | 0.0069 (0.0018)             | 0.0106 (0.0016)             | 0.0254 (0.0015)             |
|                   | P+T-funct-LASSO  | -0.0162 (0.002)             | -0.0081 (0.0018)            | 0.011 (0.0016)              |
|                   | LDpred           | -0.0087 (0.0017)            | 0.0028 (0.0013)             | 0.0267 (8e-04)              |
|                   | AnnoPred         | -0.0169 (0.0018)            | -0.0054 (0.0017)            | 0.0203 (0.0012)             |
|                   | LDpred-funct-inf | 0.0235 (8e-04)              | 0.0225 (6e-04)              | 0.0142 (6e-04)              |
|                   | LDpred-funct     | 0                           | 0                           | 0                           |
| 2,000             | P+T              | 0.0365 (0.0019)             | 0.0361 (0.0022)             | 0.0451 (0.0026)             |
|                   | P+T-funct-LASSO  | 0.0153 (0.0023)             | 0.0194 (0.0024)             | 0.0317 (0.0027)             |
|                   | LDpred           | 0.0019 (0.0026)             | 0.0078 (0.0019)             | 0.0213 (7e-04)              |
|                   | AnnoPred         | -0.0056 (0.0012)            | -0.0012 (0.0012)            | 0.0167 (7e-04)              |
|                   | LDpred-funct-inf | 0.0123 (5e-04)              | 0.0118 (5e-04)              | 0.0077 (4e-04)              |
|                   | LDpred-funct     | 0                           | 0                           | 0                           |
| 5,000             | P+T              | 0.0544 (0.0016)             | 0.055 (0.0018)              | 0.0609 (0.0021)             |
|                   | P+T-funct-LASSO  | 0.0345 (0.0017)             | 0.036 (0.0019)              | 0.0471 (0.0023)             |
|                   | LDpred           | 0.0067 (0.0013)             | 0.007 (7e-04)               | 0.0157 (5e-04)              |
|                   | AnnoPred         | -0.0035 (5e-04)             | -0.0015 (6e-04)             | 0.011 (6e-04)               |
|                   | LDpred-funct-inf | 0.0023 (3e-04)              | 0.0029 (3e-04)              | 0.0018 (2e-04)              |
|                   | LDpred-funct     | 0                           | 0                           | 0                           |
| 10,000            | P+T              | 0.0597 (0.0016)             | 0.0612 (0.002)              | 0.0674 (0.0024)             |
|                   | P+T-funct-LASSO  | 0.0451 (0.0017)             | 0.0464 (0.0022)             | 0.0576 (0.0026)             |
|                   | LDpred           | 0.0107 (0.0013)             | 0.0089 (5e-04)              | 0.0136 (5e-04)              |
|                   | AnnoPred         | -0.0011 (3e-04)             | -4e-04 (5e-04)              | 0.0085 (5e-04)              |
|                   | LDpred-funct-inf | -4e-04 (2e-04)              | -1e-04 (2e-04)              | -7e-04 (2e-04)              |
|                   | LDpred-funct     | 0                           | 0                           | 0                           |

(b)

| # Causal variants | Model            | Training sample size        |                             |                             |
|-------------------|------------------|-----------------------------|-----------------------------|-----------------------------|
|                   |                  | 10,000                      | 20,000                      | 50,000                      |
|                   |                  | Diff. $R^2$ ( <i>s.e.</i> ) | Diff. $R^2$ ( <i>s.e.</i> ) | Diff. $R^2$ ( <i>s.e.</i> ) |
| 1,000             | P+T              | -0.0165 (0.0035)            | -0.0094 (0.0034)            | -2e-04 (0.0033)             |
|                   | LDpred           | 0                           | 0                           | 0                           |
|                   | P+T-funct-LASSO  | 0.0067 (0.0037)             | 0.0088 (0.0037)             | 0.0141 (0.0035)             |
|                   | AnnoPred         | 0.0084 (0.0019)             | 0.0083 (0.0018)             | 0.0066 (0.0011)             |
|                   | LDpred-funct-inf | -0.0321 (0.0017)            | -0.0198 (0.0012)            | 0.0125 (6e-04)              |
|                   | LDpred-funct     | -0.0087 (0.0017)            | 0.0028 (0.0013)             | 0.0267 (8e-04)              |
| 2,000             | P+T              | -0.0352 (0.0036)            | -0.0294 (0.0035)            | -0.0254 (0.0036)            |
|                   | LDpred           | 0                           | 0                           | 0                           |
|                   | P+T-funct-LASSO  | -0.0146 (0.0039)            | -0.0129 (0.0036)            | -0.0121 (0.0037)            |
|                   | AnnoPred         | 0.0074 (0.0025)             | 0.0091 (0.0019)             | 0.0045 (5e-04)              |
|                   | LDpred-funct-inf | -0.0104 (0.0025)            | -0.004 (0.0019)             | 0.0137 (5e-04)              |
|                   | LDpred-funct     | 0.0019 (0.0026)             | 0.0078 (0.0019)             | 0.0213 (7e-04)              |
| 5,000             | P+T              | -0.048 (0.0024)             | -0.0488 (0.0026)            | -0.0466 (0.0031)            |
|                   | LDpred           | 0                           | 0                           | 0                           |
|                   | P+T-funct-LASSO  | -0.0283 (0.0026)            | -0.03 (0.0028)              | -0.0329 (0.0033)            |
|                   | AnnoPred         | 0.0103 (0.0012)             | 0.0085 (8e-04)              | 0.0046 (5e-04)              |
|                   | LDpred-funct-inf | 0.0044 (0.0013)             | 0.0041 (7e-04)              | 0.0139 (4e-04)              |
|                   | LDpred-funct     | 0.0067 (0.0013)             | 0.007 (7e-04)               | 0.0157 (5e-04)              |
| 10,000            | P+T              | -0.0493 (0.0022)            | -0.0532 (0.0024)            | -0.0551 (0.0031)            |
|                   | LDpred           | 0                           | 0                           | 0                           |
|                   | P+T-funct-LASSO  | -0.0348 (0.0024)            | -0.0386 (0.0026)            | -0.0454 (0.0033)            |
|                   | AnnoPred         | 0.0118 (0.0013)             | 0.0094 (5e-04)              | 0.0051 (4e-04)              |
|                   | LDpred-funct-inf | 0.0111 (0.0012)             | 0.009 (4e-04)               | 0.0143 (5e-04)              |
|                   | LDpred-funct     | 0.0107 (0.0013)             | 0.0089 (5e-04)              | 0.0136 (5e-04)              |

**Supplementary Table 2: Differences between polygenic prediction methods in simulations using UK Biobank genotypes, for 4 values of the number of causal variants.** We report results for P+T, LDpred, P+T-funct-LASSO, AnnoPred, LDpred-funct-inf and LDpred-funct in chromosome 1 simulations with 1,000 causal variants (very sparse architecture), 2,000 causal variants (sparse architecture), 5,000 causal variants (polygenic architecture) and 10,000 causal variants (very polygenic architecture). Results are averaged across 100 simulations. We report standard errors in parentheses. (a) Difference between  $R^2$  for LDpred-funct vs.  $R^2$  for each method. (b) Difference between  $R^2$  for each method vs.  $R^2$  for LDpred.

| # Causal | Training sample size |        |        |
|----------|----------------------|--------|--------|
|          | 10,000               | 20,000 | 50,000 |
| 1,000    | 0.03                 | 0.1    | 1      |
| 2,000    | 0.03                 | 0.1    | 1      |
| 5,000    | 0.03                 | 0.1    | 1      |
| 10,000   | 0.1                  | 0.3    | 1      |

**Supplementary Table 3: Model parameter values for LDpred in simulations.** We report the optimal value of  $p$  which is the fraction of non-zero effects in the prior.

| # Causal |                            | Training sample size |        |        |
|----------|----------------------------|----------------------|--------|--------|
|          |                            | 10,000               | 20,000 | 50,000 |
| 1,000    | P+T                        | 0.0001               | 0.0001 | 0.0001 |
|          | P+T-funct-LASSO HP SNP Set | 0.1000               | 0.1000 | 0.3000 |
|          | P+T-funct-LASSO LP SNP Set | 0.0100               | 0.0100 | 0.0100 |
| 2,000    | P+T                        | 0.0010               | 0.0010 | 0.0010 |
|          | P+T-funct-LASSO HP SNP Set | 0.1000               | 0.1000 | 0.3000 |
|          | P+T-funct-LASSO LP SNP Set | 0.0100               | 0.0100 | 0.0100 |
| 5,000    | P+T                        | 0.0100               | 0.0100 | 0.0100 |
|          | P+T-funct-LASSO HP SNP Set | 0.3000               | 0.3000 | 0.3000 |
|          | P+T-funct-LASSO LP SNP Set | 0.1000               | 0.1000 | 0.1000 |
| 10,000   | P+T                        | 0.1000               | 0.1000 | 0.0100 |
|          | P+T-funct-LASSO HP SNP Set | 0.3000               | 0.3000 | 1.0000 |
|          | P+T-funct-LASSO LP SNP Set | 0.1000               | 0.1000 | 0.1000 |

**Supplementary Table 4: Model parameter values for P+T and P+T-funct-LASSO in simulations.** We report the optimal p-value threshold for Pruning + Thresholding (P+T), optimal p-value threshold for P+T-funct-LASSO high prior SNP (HP) set and optimal p-value threshold for P+T-funct-LASSO low prior SNP (LP) set (p-values obtained from two-sided t-tests and the parameter is optimized over a range of values as described in the Methods section). Optimal  $R_{LD}^2$  values was 0.1.

| # Causal | Training sample size |        |        |
|----------|----------------------|--------|--------|
|          | 10,000               | 20,000 | 50,000 |
| 1,000    | 0.03                 | 0.10   | 1.00   |
| 2,000    | 0.03                 | 0.10   | 1.00   |
| 5,000    | 0.03                 | 0.10   | 1.00   |
| 10,000   | 0.10                 | 0.10   | 1.00   |

**Supplementary Table 5: Model parameter values for AnnoPred in simulations.** Model parameter values for AnnoPred in simulations. We report the optimal value of  $p$ , the proportion of causal variants in the AnnoPred model, for each number of causal variants and sample size simulated.



| Method           | Posterior mean effects | LD matrices | Total  |
|------------------|------------------------|-------------|--------|
| P+T              | NA                     | 11          | 11     |
| LDpred           | 4,268 (151)            | 3734        | 8,003  |
| SBayesR          | 142 (9)                | 19200       | 19,342 |
| P+T-func-LASSO   | NA                     | 11          | 11     |
| AnnoPred         | 5,249 (87)             | 3734        | 8,983  |
| LDpred-funct-inf | 71 (10.47)             | NA          | 71     |
| LDpred-funct     | 71 (10.47)             | NA          | 71     |

**Supplementary Table 6: Average running time for all 7 methods.** We report average running times in minutes for each method. We separately report the time to estimate posterior mean causal effect sizes, and the time to compute LD matrices (not applicable for LDpred-funct-inf and LD-pred-funct) (we do not include the time to compute polygenic risk scores, which is small in comparison and depends on the number of validation samples). LDpred-funct includes an additional step, the estimation of regularization weights, but this adds minimal additional computational cost (roughly 2 minutes). We estimated running times for chromosome 1 (roughly 10% of the genome) across 20 simulations for estimation of posterior mean effect sizes and one simulation for LD computation, and extrapolated the results to the whole genome. Thus, we report s.e. in parentheses for estimation of posterior mean effect sizes only. LDpred, AnnoPred, LDpred-funct-inf and LDpred-funct require a data coordination step (coordinating the summary statistics file, validation genotypes and LD reference genotypes (in this case the same as the validation)), which required an additional 193 minutes for LDpred and AnnoPred and 141 minutes for LDpred-funct-inf and LDpred-funct. The running time for computation of the LD matrices for SBayesR is copied from ref. 9 (1.1M SNP set), as we did not repeat this computation.

| # Causal variants | Model            | Training sample size |                      |                      |
|-------------------|------------------|----------------------|----------------------|----------------------|
|                   |                  | 10,000               | 20,000               | 50,000               |
|                   |                  | Average $R^2$ (s.e.) | Average $R^2$ (s.e.) | Average $R^2$ (s.e.) |
| 1,000             | P+T              | 0.9371 ( 0.0282 )    | 0.9806 ( 0.0294 )    | 0.8189 ( 0.0486 )    |
|                   | LDpred           | 0.992 ( 0.0146 )     | 0.947 ( 0.0083 )     | 0.8521 ( 0.004 )     |
|                   | P+T-funct-LASSO  | 1.5051 ( 0.0589 )    | 1.3703 ( 0.0386 )    | 1.0151 ( 0.075 )     |
|                   | AnnoPred         | 0.8222 ( 0.0171 )    | 0.7832 ( 0.0187 )    | 0.761 ( 0.0154 )     |
|                   | LDpred-funct-inf | 0.4708 ( 0.0025 )    | 0.454 ( 0.002 )      | 0.4345 ( 0.0024 )    |
|                   | LDpred-funct     | 0.9803 ( 6e-04 )     | 0.9847 ( 4e-04 )     | 0.9877 ( 4e-04 )     |
| 2,000             | P+T              | 0.7644 ( 0.0309 )    | 0.791 ( 0.0257 )     | 0.7976 ( 0.0209 )    |
|                   | LDpred           | 0.9688 ( 0.037 )     | 0.9346 ( 0.0257 )    | 0.8483 ( 0.0044 )    |
|                   | P+T-funct-LASSO  | 1.3572 ( 0.0382 )    | 1.2138 ( 0.0544 )    | 1.0448 ( 0.0284 )    |
|                   | AnnoPred         | 0.9258 ( 0.0084 )    | 0.8849 ( 0.0089 )    | 0.8136 ( 0.0025 )    |
|                   | LDpred-funct-inf | 0.4656 ( 0.004 )     | 0.457 ( 0.0028 )     | 0.4396 ( 0.0021 )    |
|                   | LDpred-funct     | 0.9787 ( 0.001 )     | 0.9837 ( 7e-04 )     | 0.9882 ( 4e-04 )     |
| 5,000             | P+T              | 0.4546 ( 0.0207 )    | 0.5954 ( 0.0172 )    | 0.6728 ( 0.0158 )    |
|                   | LDpred           | 0.9984 ( 0.0067 )    | 0.9671 ( 0.0071 )    | 0.8538 ( 0.0044 )    |
|                   | P+T-funct-LASSO  | 0.8085 ( 0.0267 )    | 0.8994 ( 0.012 )     | 0.909 ( 0.0213 )     |
|                   | AnnoPred         | 0.949 ( 0.0034 )     | 0.9092 ( 0.0031 )    | 0.8128 ( 0.0024 )    |
|                   | LDpred-funct-inf | 0.47 ( 0.0035 )      | 0.4584 ( 0.0023 )    | 0.4424 ( 0.0015 )    |
|                   | LDpred-funct     | 0.9776 ( 9e-04 )     | 0.9839 ( 5e-04 )     | 0.9881 ( 4e-04 )     |
| 10,000            | P+T              | 0.3196 ( 0.0136 )    | 0.4655 ( 0.016 )     | 0.586 ( 0.0116 )     |
|                   | LDpred           | 0.9903 ( 0.0156 )    | 0.9449 ( 0.0059 )    | 0.847 ( 0.0041 )     |
|                   | P+T-funct-LASSO  | 0.6824 ( 0.0182 )    | 0.8142 ( 0.0182 )    | 0.8178 ( 0.017 )     |
|                   | AnnoPred         | 0.9468 ( 0.0033 )    | 0.9086 ( 0.0034 )    | 0.811 ( 0.0021 )     |
|                   | LDpred-funct-inf | 0.4654 ( 0.0028 )    | 0.4528 ( 0.0025 )    | 0.4365 ( 0.0024 )    |
|                   | LDpred-funct     | 0.9761 ( 7e-04 )     | 0.9824 ( 6e-04 )     | 0.9874 ( 4e-04 )     |

**Supplementary Table 7: Calibration of 6 polygenic prediction methods in simulations using UK Biobank genotypes, for 4 values of the number of causal variants.** We report calibration slopes for P+T, LDpred, P+T-funct-LASSO, AnnoPred, LDpred-funct-inf and LDpred-funct in chromosome 1 simulations with 1,000 causal variants (very sparse architecture), 2,000 causal variants (sparse architecture), 5,000 causal variants (polygenic architecture) and 10,000 causal variants (very polygenic architecture). Results are averaged across 100 simulations.

| # Causal variants    | Model               | Training sample size          |                               |                               |
|----------------------|---------------------|-------------------------------|-------------------------------|-------------------------------|
|                      |                     | 10,000                        | 20,000                        | 50,000                        |
|                      |                     | Average $R^2$ ( <i>s.e.</i> ) | Average $R^2$ ( <i>s.e.</i> ) | Average $R^2$ ( <i>s.e.</i> ) |
| 1,000                | LDpred-funct-inf    | 0.1896 ( 0.0018)              | 0.2419 ( 0.0019)              | 0.3015 ( 0.0019)              |
|                      | LDpred-funct-inf-5  | 0.208 ( 0.002)                | 0.2585 ( 0.002)               | 0.3104 ( 0.0019)              |
|                      | LDpred-funct-inf-10 | 0.2101 ( 0.002)               | 0.261 ( 0.002)                | 0.3124 ( 0.002)               |
|                      | LDpred-funct-inf-20 | 0.2116 ( 0.002)               | 0.263 ( 0.002)                | 0.314 ( 0.002)                |
|                      | LDpred-funct-inf-30 | 0.2126 ( 0.002)               | 0.2638 ( 0.002)               | 0.315 ( 0.002)                |
|                      | LDpred-funct-inf-40 | 0.2131 ( 0.002)               | 0.2644 ( 0.0021)              | 0.3157 ( 0.002)               |
|                      | LDpred-funct-inf-50 | 0.2141 ( 0.002)               | 0.2652 ( 0.0021)              | 0.3161 ( 0.002)               |
|                      | LDpred-funct-inf-60 | 0.2145 ( 0.0021)              | 0.2655 ( 0.0021)              | 0.3172 ( 0.002)               |
|                      | LDpred-funct-inf-70 | 0.2157 ( 0.0021)              | 0.266 ( 0.0021)               | 0.317 ( 0.0021)               |
|                      | LDpred-funct-inf-80 | 0.216 ( 0.002)                | 0.2665 ( 0.0021)              | 0.3173 ( 0.0021)              |
|                      | LDpred-funct-inf-90 | 0.2164 ( 0.0021)              | 0.2667 ( 0.0021)              | 0.3176 ( 0.0021)              |
| LDpred-funct-inf-100 | 0.2165 ( 0.0021)    | 0.267 ( 0.0021)               | 0.3174 ( 0.0021)              |                               |
| 2,000                | LDpred-funct-inf    | 0.1900 ( 0.0015)              | 0.2458 ( 0.0015)              | 0.3057 ( 0.0016)              |
|                      | LDpred-funct-inf-5  | 0.1994 ( 0.0016)              | 0.254 ( 0.0016)               | 0.3101 ( 0.0016)              |
|                      | LDpred-funct-inf-10 | 0.2005 ( 0.0016)              | 0.2554 ( 0.0016)              | 0.3113 ( 0.0017)              |
|                      | LDpred-funct-inf-20 | 0.2016 ( 0.0016)              | 0.2566 ( 0.0016)              | 0.3124 ( 0.0017)              |
|                      | LDpred-funct-inf-30 | 0.2018 ( 0.0016)              | 0.2572 ( 0.0016)              | 0.3129 ( 0.0017)              |
|                      | LDpred-funct-inf-40 | 0.2023 ( 0.0016)              | 0.2576 ( 0.0016)              | 0.3134 ( 0.0017)              |
|                      | LDpred-funct-inf-50 | 0.2023 ( 0.0016)              | 0.2575 ( 0.0016)              | 0.3136 ( 0.0017)              |
|                      | LDpred-funct-inf-60 | 0.2025 ( 0.0016)              | 0.258 ( 0.0017)               | 0.3137 ( 0.0017)              |
|                      | LDpred-funct-inf-70 | 0.2027 ( 0.0016)              | 0.2579 ( 0.0017)              | 0.3135 ( 0.0017)              |
|                      | LDpred-funct-inf-80 | 0.2031 ( 0.0016)              | 0.2583 ( 0.0017)              | 0.3133 ( 0.0017)              |
|                      | LDpred-funct-inf-90 | 0.2028 ( 0.0016)              | 0.2579 ( 0.0017)              | 0.3134 ( 0.0018)              |
| LDpred-funct-inf-100 | 0.2031 ( 0.0016)    | 0.2582 ( 0.0017)              | 0.313 ( 0.0018)               |                               |
| 5,000                | LDpred-funct-inf    | 0.1872 ( 0.0012)              | 0.243 ( 0.0013)               | 0.3063 ( 0.0014)              |
|                      | LDpred-funct-inf-5  | 0.1895 ( 0.0012)              | 0.2451 ( 0.0013)              | 0.3075 ( 0.0014)              |
|                      | LDpred-funct-inf-10 | 0.1898 ( 0.0012)              | 0.2456 ( 0.0013)              | 0.3079 ( 0.0014)              |
|                      | LDpred-funct-inf-20 | 0.1897 ( 0.0012)              | 0.2461 ( 0.0013)              | 0.3083 ( 0.0014)              |
|                      | LDpred-funct-inf-30 | 0.1898 ( 0.0012)              | 0.2461 ( 0.0013)              | 0.3084 ( 0.0014)              |
|                      | LDpred-funct-inf-40 | 0.1895 ( 0.0012)              | 0.2458 ( 0.0013)              | 0.3081 ( 0.0014)              |
|                      | LDpred-funct-inf-50 | 0.1894 ( 0.0012)              | 0.2457 ( 0.0013)              | 0.3081 ( 0.0014)              |
|                      | LDpred-funct-inf-60 | 0.1893 ( 0.0012)              | 0.2454 ( 0.0013)              | 0.3077 ( 0.0014)              |
|                      | LDpred-funct-inf-70 | 0.1891 ( 0.0012)              | 0.245 ( 0.0013)               | 0.3073 ( 0.0014)              |
|                      | LDpred-funct-inf-80 | 0.1888 ( 0.0012)              | 0.2447 ( 0.0013)              | 0.3071 ( 0.0014)              |
|                      | LDpred-funct-inf-90 | 0.1885 ( 0.0012)              | 0.2444 ( 0.0013)              | 0.3066 ( 0.0014)              |
| LDpred-funct-inf-100 | 0.188 ( 0.0012)     | 0.244 ( 0.0013)               | 0.3062 ( 0.0014)              |                               |
| 10,000               | LDpred-funct-inf    | 0.1873 ( 0.0012)              | 0.2419 ( 0.0012)              | 0.3059 ( 0.0013)              |
|                      | LDpred-funct-inf-5  | 0.1883 ( 0.0012)              | 0.2428 ( 0.0012)              | 0.3064 ( 0.0013)              |
|                      | LDpred-funct-inf-10 | 0.1882 ( 0.0012)              | 0.2428 ( 0.0012)              | 0.3064 ( 0.0012)              |
|                      | LDpred-funct-inf-20 | 0.1878 ( 0.0012)              | 0.2427 ( 0.0012)              | 0.3061 ( 0.0012)              |
|                      | LDpred-funct-inf-30 | 0.1873 ( 0.0013)              | 0.2422 ( 0.0012)              | 0.3056 ( 0.0013)              |
|                      | LDpred-funct-inf-40 | 0.187 ( 0.0013)               | 0.2418 ( 0.0012)              | 0.3053 ( 0.0012)              |
|                      | LDpred-funct-inf-50 | 0.1865 ( 0.0012)              | 0.2414 ( 0.0012)              | 0.3049 ( 0.0013)              |
|                      | LDpred-funct-inf-60 | 0.186 ( 0.0013)               | 0.2409 ( 0.0012)              | 0.3043 ( 0.0013)              |
|                      | LDpred-funct-inf-70 | 0.1855 ( 0.0013)              | 0.2406 ( 0.0012)              | 0.3039 ( 0.0013)              |
|                      | LDpred-funct-inf-80 | 0.1851 ( 0.0012)              | 0.2399 ( 0.0012)              | 0.3036 ( 0.0012)              |
|                      | LDpred-funct-inf-90 | 0.1846 ( 0.0013)              | 0.2393 ( 0.0012)              | 0.3027 ( 0.0013)              |
| LDpred-funct-inf-100 | 0.1841 ( 0.0013)    | 0.2387 ( 0.0012)              | 0.3027 ( 0.0013)              |                               |

**Supplementary Table 8: Sensitivity of LDpred-funct results to number of bins used for regularization in simulations using UK Biobank genotypes.** We report results with the number of posterior mean causal effect size bins used for regularization ( $K$ ) set to 10, 20, 50 or 100. LDpred-funct- $K$  denotes each respective value of  $K$ . We also report results for LDpred-funct-inf, which is identical to LDpred-funct with  $K$  set to 1. Results are averaged across 100 simulations. We report standard errors in parentheses.

| # Causal variants | Model                  | Training sample size |                      |                      |
|-------------------|------------------------|----------------------|----------------------|----------------------|
|                   |                        | 10,000               | 20,000               | 50,000               |
|                   |                        | Average $R^2$ (s.e.) | Average $R^2$ (s.e.) | Average $R^2$ (s.e.) |
| 1,000             | LDpred-funct-inf       | 0.1896 ( 0.0018)     | 0.2419 ( 0.0019)     | 0.3015 ( 0.0019)     |
|                   | LDpred-funct           | 0.2131 ( 0.002)      | 0.2644 ( 0.0021)     | 0.3157 ( 0.002)      |
|                   | LDpred-funct-inf-cheat | 0.1926 ( 0.0018)     | 0.2456 ( 0.0019)     | 0.3074 ( 0.002)      |
|                   | LDpred-funct-cheat     | 0.2221 ( 0.0021)     | 0.2714 ( 0.0022)     | 0.3228 ( 0.0021)     |
| 2,000             | LDpred-funct-inf       | 0.1900 ( 0.0015)     | 0.2458 ( 0.0015)     | 0.3057 ( 0.0016)     |
|                   | LDpred-funct           | 0.2023 ( 0.0016)     | 0.2576 ( 0.0016)     | 0.3134 ( 0.0017)     |
|                   | LDpred-funct-inf-cheat | 0.1943 ( 0.0015)     | 0.2498 ( 0.0016)     | 0.3108 ( 0.0016)     |
|                   | LDpred-funct-cheat     | 0.2109 ( 0.0016)     | 0.2646 ( 0.0017)     | 0.3193 ( 0.0017)     |
| 5,000             | LDpred-funct-inf       | 0.1872 ( 0.0012)     | 0.243 ( 0.0013)      | 0.3063 ( 0.0014)     |
|                   | LDpred-funct           | 0.1895 ( 0.0012)     | 0.2458 ( 0.0013)     | 0.3081 ( 0.0014)     |
|                   | LDpred-funct-inf-cheat | 0.1928 ( 0.0013)     | 0.2479 ( 0.0013)     | 0.3102 ( 0.0014)     |
|                   | LDpred-funct-cheat     | 0.1972 ( 0.0014)     | 0.252 ( 0.0013)      | 0.3121 ( 0.0014)     |
| 10,000            | LDpred-funct-inf       | 0.1873 ( 0.0012)     | 0.2419 ( 0.0012)     | 0.3059 ( 0.0013)     |
|                   | LDpred-funct           | 0.1870 ( 0.0013)     | 0.2418 ( 0.0012)     | 0.3053 ( 0.0012)     |
|                   | LDpred-funct-inf-cheat | 0.1937 ( 0.0012)     | 0.2474 ( 0.0012)     | 0.3097 ( 0.0012)     |
|                   | LDpred-funct-cheat     | 0.194 ( 0.0013)      | 0.2482 ( 0.0013)     | 0.3096 ( 0.0013)     |

**Supplementary Table 9: Accuracy of LDpred-funct method in simulations using UK Biobank genotypes under different BaselineLD estimates, for 4 values of the number of causal variants.** LDpred-funct-cheat refers to a "cheating" version of LDpred-funct that utilized the true baseline-LD model parameters used to simulate the data. Results are averaged across 100 simulations.

| # Causal variants | Model            | Training sample size          |                               |                               |
|-------------------|------------------|-------------------------------|-------------------------------|-------------------------------|
|                   |                  | 10,000                        | 20,000                        | 50,000                        |
|                   |                  | Average $R^2$ ( <i>s.e.</i> ) | Average $R^2$ ( <i>s.e.</i> ) | Average $R^2$ ( <i>s.e.</i> ) |
| 2,000             | P+T              | 0.0634 ( 0.0015 )             | 0.0912 ( 0.0019 )             | 0.118 ( 0.0056 )              |
|                   | LDpred           | 0.0885 ( 0.0025 )             | 0.1174 ( 0.0029 )             | 0.1447 ( 0.0028 )             |
|                   | P+T-funct-LASSO  | 0.0695 ( 0.0022 )             | 0.0988 ( 0.0021 )             | 0.1213 ( 0.006 )              |
|                   | AnnoPred         | 0.0848 ( 0.0024 )             | 0.1097 ( 0.0021 )             | 0.134 ( 0.0023 )              |
|                   | LDpred-funct-inf | 0.0759 ( 0.0019 )             | 0.1033 ( 0.0021 )             | 0.1384 ( 0.0023 )             |
|                   | LDpred-funct     | 0.0808 ( 0.0023 )             | 0.1094 ( 0.0023 )             | 0.1432 ( 0.0022 )             |
| 5,000             | P+T              | 0.0503 ( 0.0013 )             | 0.0783 ( 0.0014 )             | 0.1033 ( 0.0051 )             |
|                   | LDpred           | 0.0746 ( 0.0016 )             | 0.1041 ( 0.0016 )             | 0.1382 ( 0.0021 )             |
|                   | P+T-funct-LASSO  | 0.0578 ( 0.0015 )             | 0.0869 ( 0.0015 )             | 0.1087 ( 0.0056 )             |
|                   | AnnoPred         | 0.0772 ( 0.0016 )             | 0.1031 ( 0.0025 )             | 0.1334 ( 0.0019 )             |
|                   | LDpred-funct-inf | 0.0744 ( 0.0014 )             | 0.1032 ( 0.0016 )             | 0.1375 ( 0.0018 )             |
|                   | LDpred-funct     | 0.0754 ( 0.0015 )             | 0.105 ( 0.0017 )              | 0.139 ( 0.0018 )              |

**Supplementary Table 10: Accuracy of 6 polygenic prediction methods in simulations with lower SNP-heritability ( $h_g^2 = 0.25$ ) using UK Biobank genotypes, for 4 values of the number of causal variants.** We report results for P+T, LDpred, P+T-funct-LASSO, AnnoPred, LDpred-funct-inf and LDpred-funct in chromosome 1 simulations with 1,000 causal variants (very sparse architecture), 2,000 causal variants (sparse architecture), 5,000 causal variants (polygenic architecture) and 10,000 causal variants (very polygenic architecture). Results are averaged across 20 simulations. We report standard errors in parentheses. For SBayesR simulations at N=10K, we obtained average prediction  $R^2$  of 0.0625 ( 0.0086 ) and 0.0618 ( 0.0053 ) for 2,000, and 5,000 causal variants respectively. However, for all SBayesR simulations at N=20K and N=50K, we obtained average prediction  $R^2$  of 0.0002 (0.0001) and  $h_g^2 = 0.99$  in 20/20 simulations, perhaps because the algorithm failed to converge.

|    | Trait                   | $h_g^2$ | Training<br>N | Validation<br>N (ancestry distribution) |
|----|-------------------------|---------|---------------|-----------------------------------------|
| 1  | Height                  | 0.57    | 408092        | 24351 (40.3% Irish,59.7% Other)         |
| 2  | Hair color              | 0.45    | 403024        | 24114 (40.3% Irish,59.7% Other)         |
| 3  | Platelet count          | 0.40    | 395747        | 23616 (40.4% Irish,59.6% Other)         |
| 4  | Bone mineral density    | 0.40    | 397274        | 23505 (40.4% Irish,59.6% Other)         |
| 5  | Red blood cell count    | 0.32    | 396464        | 23644 (40.4% Irish,59.6% Other)         |
| 6  | Age at menarche         | 0.31    | 214860        | 13737 (36.5% Irish,63.5% Other)         |
| 7  | FEV1 FVC ratio          | 0.31    | 331786        | 19457 (39.5% Irish,60.5% Other)         |
| 8  | Body mass index         | 0.31    | 407667        | 24322 (40.3% Irish,59.7% Other)         |
| 9  | RBC distribution width  | 0.29    | 394258        | 23518 (40.3% Irish,59.7% Other)         |
| 10 | Forced vital capacity   | 0.27    | 331786        | 19457 (39.5% Irish,60.5% Other)         |
| 11 | Eosinophil count        | 0.27    | 391787        | 23377 (40.3% Irish,59.7% Other)         |
| 12 | White blood cell count  | 0.27    | 395835        | 23634 (40.4% Irish,59.6% Other)         |
| 13 | Systolic Blood pressure | 0.27    | 376437        | 22531 (40.1% Irish,59.9% Other)         |
| 14 | Waist hip ratio         | 0.21    | 408196        | 24354 (40.3% Irish,59.7% Other)         |

**Supplementary Table 11: List of 14 UK Biobank quantitative traits.** We list the training sample size and validation sample size for each trait.  $h_g^2$  estimates are obtained using BOLT-LMM v2.3 using the training data set.

|   | Trait                   | $h_g^2$ | Training |            | Validation                       |            |
|---|-------------------------|---------|----------|------------|----------------------------------|------------|
|   |                         |         | N        | Prevalence | N (ancestry distribution)        | Prevalence |
| 1 | Balding Type I          | 0.32    | 186,506  | 0.32       | 10,171 (45.9% Irish,54.1% Other) | 0.35       |
| 2 | Tanning                 | 0.23    | 400,721  | 0.39       | 23,947 (40.4% Irish,59.6% Other) | 0.61       |
| 3 | College Education       | 0.20    | 405,140  | 0.31       | 24,085 (40.4% Irish,59.6% Other) | 0.50       |
| 4 | Hypertension            | 0.18    | 408,323  | 0.27       | 24,368 (40.3% Irish,59.7% Other) | 0.24       |
| 5 | Cardiovascular Diseases | 0.16    | 408,963  | 0.32       | 24,435 (40.3% Irish,59.7% Other) | 0.29       |
| 6 | Morning Person          | 0.14    | 365,245  | 0.37       | 22,188 (40.2% Irish,59.8% Other) | 0.58       |
| 7 | Eczema                  | 0.12    | 408,454  | 0.23       | 24,374 (40.4% Irish,59.6% Other) | 0.23       |

**Supplementary Table 12: List of 7 UK Biobank binary traits.** We list the training sample size, validation sample size and prevalence for each trait.  $h_g^2$  estimates are obtained using BOLT-LMM v2.3 using the training data set.

|    | Trait                   | Training $N$ | $h_g^2$ | $c$  | bins |
|----|-------------------------|--------------|---------|------|------|
| 1  | Height                  | 408092       | 0.57    | 0.45 | 100  |
| 2  | Hair color              | 403024       | 0.45    | 0.22 | 100  |
| 3  | Platelet count          | 395747       | 0.40    | 0.29 | 88   |
| 4  | Bone mineral density    | 397274       | 0.40    | 0.26 | 87   |
| 5  | Red blood cell count    | 396464       | 0.32    | 0.21 | 70   |
| 6  | Age at menarche         | 214860       | 0.31    | 0.20 | 40   |
| 7  | FEV1 FVC ratio          | 331786       | 0.31    | 0.24 | 56   |
| 8  | Body mass index         | 407667       | 0.31    | 0.27 | 70   |
| 9  | RBC distribution width  | 394258       | 0.29    | 0.20 | 63   |
| 10 | Eosinophil count        | 391787       | 0.27    | 0.18 | 60   |
| 11 | Forced vital capacity   | 331786       | 0.27    | 0.22 | 50   |
| 12 | White blood cell count  | 395835       | 0.27    | 0.21 | 60   |
| 13 | Systolic Blood pressure | 376437       | 0.27    | 0.21 | 56   |
| 14 | Waist hip ratio         | 408196       | 0.21    | 0.15 | 48   |
| 1  | Balding type I          | 186506       | 0.32    | 0.11 | 31   |
| 2  | Tanning ability         | 400721       | 0.23    | 0.09 | 53   |
| 3  | College Education       | 405140       | 0.20    | 0.15 | 45   |
| 4  | Hypertension            | 408323       | 0.18    | 0.14 | 41   |
| 5  | Cardiovascular Diseases | 408963       | 0.16    | 0.12 | 37   |
| 6  | Morning Person          | 365245       | 0.14    | 0.11 | 29   |
| 7  | Eczema                  | 408454       | 0.12    | 0.09 | 27   |

**Supplementary Table 13: Parameter values for 21 UK Biobank traits.** The 14 quantitative traits are listed first, followed by the 7 binary traits. For each trait, we list the training sample size,  $h_g^2$  estimate (from BOLT-LMM v2.3; used by LDpred, LDpred-funct-inf and LDpred-funct), the  $c$  parameter (used by LDpred-funct-inf and LDpred-funct) and number of bins for LDpred-funct.



| Trait                      | $h_g^2$ | P+T                | LDpred             | SBayesR            | P+T-funct-LASSO    | AnnoPred           | LDpred-funct-inf   | LDpred-funct       |
|----------------------------|---------|--------------------|--------------------|--------------------|--------------------|--------------------|--------------------|--------------------|
| 1 Height                   | 0.575   | 0.3481<br>(0.0145) | 0.3820<br>(0.0204) | 0.3820<br>(0.0197) | 0.3684<br>(0.0172) | 0.4063<br>(0.0276) | 0.4003<br>(0.0196) | 0.4131<br>(0.0261) |
| 2 Hair color               | 0.446   | 0.2418<br>(0.0794) | 0.2507<br>(0.1024) | 0.3241<br>(0.1236) | 0.2413<br>(0.0874) | 0.2616<br>(0.1095) | 0.2638<br>(0.1059) | 0.3258<br>(0.1305) |
| 3 Platelet count           | 0.401   | 0.2044<br>(0.0228) | 0.2349<br>(0.0227) | 0.2338<br>(0.0264) | 0.2187<br>(0.0245) | 0.2333<br>(0.0221) | 0.2290<br>(0.0202) | 0.2428<br>(0.0275) |
| 4 Bone mineral density     | 0.398   | 0.1906<br>(0.0190) | 0.2096<br>(0.0216) | 0.2176<br>(0.0193) | 0.2024<br>(0.0206) | 0.2281<br>(0.0210) | 0.2107<br>(0.0186) | 0.2227<br>(0.0248) |
| 5 Red blood cell count     | 0.319   | 0.1244<br>(0.0143) | 0.1494<br>(0.0158) | 0.1523<br>(0.0167) | 0.1309<br>(0.0149) | 0.1676<br>(0.0158) | 0.1568<br>(0.0141) | 0.1652<br>(0.0207) |
| 6 Age at menarche          | 0.313   | 0.0716<br>(0.0054) | 0.1078<br>(0.0100) | 0.1057<br>(0.0098) | 0.0873<br>(0.0066) | 0.1113<br>(0.0103) | 0.1054<br>(0.0090) | 0.1078<br>(0.0185) |
| 7 FEV1 FVC ratio           | 0.309   | 0.1012<br>(0.0077) | 0.1238<br>(0.0095) | 0.1348<br>(0.0098) | 0.1124<br>(0.0076) | 0.1417<br>(0.0099) | 0.1289<br>(0.0090) | 0.1317<br>(0.0172) |
| 8 Body mass index          | 0.307   | 0.1071<br>(0.0044) | 0.1414<br>(0.0076) | 0.1402<br>(0.0072) | 0.1186<br>(0.0059) | 0.1519<br>(0.0079) | 0.1491<br>(0.0073) | 0.1481<br>(0.0152) |
| 9 RBC distribution width   | 0.286   | 0.1190<br>(0.0141) | 0.1302<br>(0.0147) | 0.1399<br>(0.0157) | 0.1299<br>(0.0177) | 0.1458<br>(0.0147) | 0.1394<br>(0.0145) | 0.1496<br>(0.0203) |
| 10 Eosinophil count        | 0.274   | 0.1109<br>(0.0102) | 0.1259<br>(0.0133) | 0.1288<br>(0.0131) | 0.1169<br>(0.0102) | 0.1391<br>(0.0144) | 0.1342<br>(0.0130) | 0.1410<br>(0.0194) |
| 11 Forced vital capacity   | 0.274   | 0.0763<br>(0.0054) | 0.1083<br>(0.0072) | 0.1070<br>(0.0069) | 0.0893<br>(0.0053) | 0.1196<br>(0.0074) | 0.1153<br>(0.0068) | 0.1147<br>(0.0152) |
| 12 White blood cell count  | 0.273   | 0.0964<br>(0.0069) | 0.1145<br>(0.0095) | 0.1256<br>(0.0095) | 0.1085<br>(0.0093) | 0.1325<br>(0.0094) | 0.1244<br>(0.0090) | 0.1274<br>(0.0160) |
| 13 Systolic Blood pressure | 0.267   | 0.0827<br>(0.0055) | 0.1066<br>(0.0071) | 0.1084<br>(0.0069) | 0.0967<br>(0.0053) | 0.1195<br>(0.0071) | 0.1135<br>(0.0066) | 0.1136<br>(0.0138) |
| 14 Waist hip ratio         | 0.210   | 0.0567<br>(0.0039) | 0.0782<br>(0.0062) | 0.0782<br>(0.0064) | 0.0646<br>(0.0046) | 0.0855<br>(0.0069) | 0.0786<br>(0.0051) | 0.0806<br>(0.0117) |
| 15 Average                 | 0.330   | 0.1379<br>(0.002)  | 0.1617<br>(0.0098) | 0.1699<br>(0.0108) | 0.1490<br>(0.008)  | 0.1745<br>(0.0103) | 0.1678<br>(0.0098) | 0.1774<br>(0.0113) |

**Supplementary Table 14: Accuracy of 7 polygenic prediction methods across 14 UK Biobank quantitative traits.** We report results for P+T, LDpred, SBayesR, P+T-funct-LASSO, AnnoPred, LDpred-funct-inf and LDpred-funct. Optimal parameters for each method are reported in Supplementary Table 19, Supplementary Table 18, Supplementary Table 21 and Supplementary Table 13. We report block jackknife standard error over 200 equally sized blocks of adjacent SNPs.

| Trait                     | $h_g^2$ | P+T                | LDpred             | SBayesR            | P+T-funct-LASSO    | AnnoPred           | LDpred-funct-inf   | LDpred-funct       |
|---------------------------|---------|--------------------|--------------------|--------------------|--------------------|--------------------|--------------------|--------------------|
| 1 Balding type I          | 0.323   | 0.1164<br>(0.0129) | 0.1326<br>(0.0171) | 0.1272<br>(0.0197) | 0.1272<br>(0.0162) | 0.1461<br>(0.0211) | 0.1078<br>(0.0135) | 0.1237<br>(0.0245) |
| 2 Tanning ability         | 0.235   | 0.1293<br>(0.0445) | 0.1278<br>(0.0670) | 0.1688<br>(0.0678) | 0.1298<br>(0.0467) | 0.1199<br>(0.0633) | 0.1219<br>(0.0626) | 0.1788<br>(0.0771) |
| 3 College Education       | 0.198   | 0.0611<br>(0.0028) | 0.0687<br>(0.0063) | 0.0711<br>(0.0061) | 0.0636<br>(0.0029) | 0.0694<br>(0.0064) | 0.0770<br>(0.0061) | 0.0792<br>(0.0113) |
| 4 Hypertension            | 0.179   | 0.0405<br>(0.0028) | 0.0537<br>(0.0046) | 0.0575<br>(0.0044) | 0.0467<br>(0.0032) | 0.0553<br>(0.0047) | 0.0527<br>(0.0044) | 0.0523<br>(0.0093) |
| 5 Cardiovascular Diseases | 0.160   | 0.0275<br>(0.0020) | 0.0424<br>(0.0038) | 0.0464<br>(0.0039) | 0.0335<br>(0.0025) | 0.0451<br>(0.0039) | 0.0432<br>(0.0037) | 0.0429<br>(0.0085) |
| 6 Morning Person          | 0.137   | 0.0265<br>(0.0021) | 0.0382<br>(0.0033) | 0.0382<br>(0.0031) | 0.0308<br>(0.0025) | 0.0395<br>(0.0032) | 0.0413<br>(0.0032) | 0.0409<br>(0.0087) |
| 7 Eczema                  | 0.118   | 0.0149<br>(0.0016) | 0.0273<br>(0.0032) | 0.0254<br>(0.0029) | 0.0210<br>(0.0025) | 0.0307<br>(0.0034) | 0.0279<br>(0.0031) | 0.0284<br>(0.0070) |
| 8 Average                 | 0.190   | 0.0594<br>(0.0015) | 0.0701<br>(0.0103) | 0.0764<br>(0.0103) | 0.0647<br>(0.0073) | 0.0723<br>(0.0100) | 0.0674<br>(0.0095) | 0.0780<br>(0.0116) |

**Supplementary Table 15: Accuracy of 7 polygenic prediction methods across 7 UK Biobank binary traits.** We report results for P+T, LDpred, SBayesR, P+T-funct-LASSO, AnnoPred, LDpred-funct-inf and LDpred-funct. Optimal parameters for each method are reported in Supplementary Table 19, Supplementary Table 18, Supplementary Table 21 and Supplementary Table 13. We report block jackknife standard error over 200 equally sized blocks of adjacent SNPs.

| Phenotype        | Average difference<br>vs LDpred | Average difference<br>vs LDpred-funct |
|------------------|---------------------------------|---------------------------------------|
| P+T              | -0.0194 (0.0081)                | -0.0325 (0.0094)                      |
| LDPRED           | 0.000 (0.0000)                  | -0.0131 (0.0034)                      |
| SBayesR          | 0.0067 (0.0031)                 | -0.0064 (0.0031)                      |
| P+T-LASSO        | -0.0108 (0.003)                 | -0.0239 (0.004)                       |
| AnnoPred         | 0.0093 (0.002)                  | -0.0038 (0.0034)                      |
| LDPRED-funct-inf | 0.0032 (0.0019)                 | -0.0099 (0.0026)                      |
| LDPRED-funct     | 0.0131 (0.0034)                 | 0.000 (0.0000)                        |

**Supplementary Table 16: Average absolute differences between polygenic prediction methods across 21 UK Biobank traits.** We report results for P+T, LDpred, SBayesR, P+T-funct-LASSO, AnnoPred, LDpred-funct-inf and LDpred-funct. We report the difference between prediction  $R^2$  for each method vs. prediction  $R^2$  for LDpred, and difference between prediction  $R^2$  for each method vs. prediction  $R^2$  for LDpred-funct. Block-jackknife standard errors on the differences are reported in parentheses.

|    | Method                                           | Average $R^2$ |
|----|--------------------------------------------------|---------------|
| 1  | P+T                                              | 0.1112        |
| 2  | LDpred                                           | 0.1311        |
| 3  | SBayesR                                          | 0.1379        |
| 4  | P+T-funct-LASSO                                  | 0.1203        |
| 5  | AnnoPred                                         | 0.1405        |
| 6  | LDpred-funct-inf                                 | 0.1343        |
| 7  | LDpred-funct                                     | 0.1443        |
| 8  | LDpred-inf                                       | 0.1126        |
| 9  | LDpred (without excluding long-range LD regions) | 0.0839        |
| 10 | LDpred (typed SNPs only)                         | 0.1299        |
| 11 | LDpred-funct-inf (typed SNPs only)               | 0.1124        |
| 12 | LDpred-funct (typed SNPs only)                   | 0.1198        |
| 13 | SBayesR (2.9M)                                   | 0.1227        |
| 14 | P+T-funct-LASSO-weighted                         | 0.1231        |
| 15 | P+T-funct-LASSO (5%)                             | 0.1219        |
| 16 | LDpred-funct-inf (meta31)                        | 0.1307        |
| 17 | P+T-LASSO (random)                               | 0.1178        |
| 18 | AnnoPred (random)                                | 0.1288        |
| 19 | LDpred-funct-inf (random)                        | 0.1153        |
| 20 | LDpred-funct (random)                            | 0.1271        |
| 21 | LDpred-inf + sparsity                            | 0.1282        |
| 22 | LDpred-funct-inf (baseline)                      | 0.1312        |
| 23 | LDpred-funct (baseline)                          | 0.1415        |
| 24 | LDpred-funct-inf (constant prior)                | 0.1241        |
| 25 | LDpred-funct (constant prior)                    | 0.1383        |
| 26 | LDpred-funct-inf(QCfilters)                      | 0.1339        |
| 27 | LDpred-funct-inf(UK10K)                          | 0.1354        |
| 28 | LDpred-funct-inf(UK10K, baseline-LD+LDAK)        | 0.1350        |
| 29 | LDpred-funct-inf (Baseline-LD v2.1)              | 0.1360        |
| 30 | LDpred-funct (Baseline-LD v2.1)                  | 0.1469        |

**Supplementary Table 17: Accuracy of secondary polygenic prediction methods across 21 UK Biobank traits.** Rows 1-7 correspond to average prediction  $R^2$  across 21 UK Biobank traits for each method. Row 8 correspond to the average prediction  $R^2$  from LDpred-inf. Row 9 correspond to the average prediction  $R^2$  from LDpred that includes SNPs from long-range LD regions. Rows 10-12 are methods that analyze only genotyped SNPs (601,728 genotyped SNPs after QC). Row 13 correspond to the average prediction  $R^2$  from SBayesR using 2.9M SNPs (SNP set described in Methods). Rows 14-15 are slightly modified versions of P+T-funct-LASSO. Row 16 uses baseline-LD model functional enrichments that were meta-analyzed across 31 traits. Rows 17-20 report. avg. prediction  $R^2$  functionally informed methods, P+T-funct-LASSO, AnnoPred, LDpred-funct-inf and LDpred-funct using a set of 75 random annotations. Row 21 corresponds to avg. prediction  $R^2$  of LDpred-inf with sparsity (i.e. LDpred-funct with no functional annotations except the annotation containing all SNPs). Row 22-23 uses the baseline model, instead of the baseline-LD model. Rows 24-25 report avg. prediction  $R^2$  for LDpred-funct-inf and LDpred-funct with priors replaced by indicator function that gives a constant prior to SNPs with predicted  $h^2 > 0$  and sets effect sizes to zero for SNPs with  $h^2 < 0$ . Row 26 restricts the baseline-LD model to the 6,334,603 SNPs that passed QC filters and were used for prediction. Row 27 infers baseline-LD model parameters using UK10K SNPs, instead of 1000 Genomes SNPs. Row 28 uses UK10K SNPs and uses the baseline-LD+LDAK model, instead of the baseline-LD model. Row 29-30 corresponds to the average prediction  $R^2$  for LDpred-funct-inf and LDpred-funct using baseline-LD model v2.1 (instead of baseline-LD model v1.1, which is used in our main analyses).

|    | Trait                   | $h_g^2$ | $p$    |
|----|-------------------------|---------|--------|
| 1  | Height                  | 0.57    | 0.3000 |
| 2  | Hair color              | 0.45    | 0.3000 |
| 3  | Platelet count          | 0.40    | 0.1000 |
| 4  | Bone mineral density    | 0.40    | 0.1000 |
| 5  | Balding type I          | 0.32    | 0.0300 |
| 6  | Red blood cell count    | 0.32    | 0.1000 |
| 7  | Age at menarche         | 0.31    | 0.0300 |
| 8  | FEV1 FVC ratio          | 0.31    | 0.1000 |
| 9  | Body mass index         | 0.31    | 0.1000 |
| 10 | RBC distribution width  | 0.29    | 0.1000 |
| 11 | Forced vital capacity   | 0.27    | 0.0300 |
| 12 | Eosinophil count        | 0.27    | 0.0300 |
| 13 | White blood cell count  | 0.27    | 0.1000 |
| 14 | Systolic Blood pressure | 0.27    | 0.1000 |
| 15 | Tanning ability         | 0.23    | 0.1000 |
| 16 | Waist hip ratio         | 0.21    | 0.0300 |
| 17 | College Education       | 0.20    | 0.1000 |
| 18 | Hypertension            | 0.18    | 0.0300 |
| 19 | Cardiovascular Diseases | 0.16    | 0.0300 |
| 20 | Morning Person          | 0.14    | 0.0100 |
| 21 | Eczema                  | 0.12    | 0.0100 |

**Supplementary Table 18: Model parameter values for LDpred applied to 21 UK Biobank traits.**  $h_g^2$  estimate (from BOLT-LMM v2.3),  $p$  is the fraction of non-zero effects in the prior.

| Phenotype                  | $h_g^2$ | P+T    | P-values threshold for        |                               |
|----------------------------|---------|--------|-------------------------------|-------------------------------|
|                            |         |        | P+T-funct-LASSO<br>HP SNP set | P+T-funct-LASSO<br>LP SNP set |
| 1 Height                   | 0.57    | 0.0100 | 0.30                          | 0.10                          |
| 2 Hair color               | 0.45    | 0.0010 | 0.30                          | 0.01                          |
| 3 Platelet count           | 0.40    | 0.0010 | 0.10                          | 0.10                          |
| 4 Bone mineral density     | 0.40    | 0.0010 | 0.10                          | 0.10                          |
| 5 Balding type I           | 0.32    | 0.0010 | 0.10                          | 0.01                          |
| 6 Red blood cell count     | 0.32    | 0.0010 | 0.10                          | 0.10                          |
| 7 Age at menarche          | 0.31    | 0.0100 | 0.10                          | 0.10                          |
| 8 FEV1 FVC ratio           | 0.31    | 0.0010 | 0.10                          | 0.10                          |
| 9 Body mass index          | 0.31    | 0.1000 | 0.30                          | 0.10                          |
| 10 RBC distribution width  | 0.29    | 0.0010 | 0.10                          | 0.01                          |
| 11 Forced vital capacity   | 0.27    | 0.0010 | 0.10                          | 0.10                          |
| 12 Eosinophil count        | 0.27    | 0.0010 | 0.10                          | 0.10                          |
| 13 White blood cell count  | 0.27    | 0.0100 | 0.10                          | 0.10                          |
| 14 Systolic Blood pressure | 0.27    | 0.0010 | 0.10                          | 0.10                          |
| 15 Tanning ability         | 0.23    | 0.0001 | 0.10                          | 0.01                          |
| 16 Waist hip ratio         | 0.21    | 0.0100 | 0.10                          | 0.10                          |
| 17 College Education       | 0.20    | 1.0000 | 0.30                          | 0.30                          |
| 18 Hypertension            | 0.18    | 0.0100 | 0.10                          | 0.01                          |
| 19 Cardiovascular Diseases | 0.16    | 0.0010 | 0.10                          | 0.01                          |
| 20 Morning Person          | 0.14    | 0.0100 | 0.10                          | 0.10                          |
| 21 Eczema                  | 0.12    | 0.0001 | 0.10                          | 0.01                          |

**Supplementary Table 19: Model parameter values for P+T and P+T-funct-LASSO in 21 UK Biobank traits.** We report the optimal p-value threshold for Pruning + Thresholding (P+T), optimal p-value threshold for P+T-funct-LASSO high prior SNP (HP) set and optimal p-value threshold for P+T-funct-LASSO low prior SNP (LP) set (p-values obtained from two-sided t-tests and the parameter is optimized over a range of values as described in the Methods section). Optimal  $R_{LD}^2$  values was 0.1.

|    | Phenotype               | $h_g^2$ | Absolute difference |
|----|-------------------------|---------|---------------------|
| 1  | Height                  | 0.575   | 0.0343 (0.0048)     |
| 2  | Hair color              | 0.446   | 0.0238 (0.0136)     |
| 3  | Platelet count          | 0.401   | 0.0352 (0.0045)     |
| 4  | Bone mineral density    | 0.398   | 0.0268 (0.0031)     |
| 5  | Balding type I          | 0.323   | 0.0230 (0.0031)     |
| 6  | Red blood cell count    | 0.319   | 0.0325 (0.0042)     |
| 7  | Age at menarche         | 0.313   | 0.0151 (0.0027)     |
| 8  | FEV1 FVC ratio          | 0.309   | 0.0202 (0.0030)     |
| 9  | Body mass index         | 0.307   | 0.0126 (0.0019)     |
| 10 | RBC distribution width  | 0.286   | 0.0388 (0.0074)     |
| 11 | Forced vital capacity   | 0.274   | 0.0198 (0.0021)     |
| 12 | Eosinophil count        | 0.274   | 0.0388 (0.0062)     |
| 13 | White blood cell count  | 0.273   | 0.0239 (0.0037)     |
| 14 | Systolic Blood pressure | 0.267   | 0.0155 (0.0021)     |
| 15 | Tanning ability         | 0.235   | 0.0394 (0.0183)     |
| 16 | Waist hip ratio         | 0.210   | 0.0142 (0.0018)     |
| 17 | College Education       | 0.198   | 0.0052 (0.0028)     |
| 18 | Hypertension            | 0.179   | 0.0074 (0.0013)     |
| 19 | Cardiovascular Diseases | 0.160   | 0.0060 (0.0012)     |
| 20 | Morning Person          | 0.137   | 0.0042 (0.0015)     |
| 21 | Eczema                  | 0.118   | 0.0073 (0.0010)     |
| 22 | Average across traits   | 0.286   | 0.0211 (0.0020)     |

**Supplementary Table 20: Difference between LDpred-funct-inf and LDpred-inf.** LDpred-funct-inf significantly outperforms LDpred-inf ( $P < 10^{-20}$  for difference using one-sided z-test based on block-jackknife standard error)

|    | Trait                   | $h_g^2$ | $p$    |
|----|-------------------------|---------|--------|
| 1  | Height                  | 0.57    | 0.3000 |
| 2  | Hair color              | 0.45    | 1.0000 |
| 3  | Platelet count          | 0.40    | 0.3000 |
| 4  | Bone mineral density    | 0.40    | 0.3000 |
| 5  | Balding type I          | 0.32    | 0.0300 |
| 6  | Red blood cell count    | 0.32    | 0.3000 |
| 7  | Age at menarche         | 0.31    | 0.1000 |
| 8  | FEV1 FVC ratio          | 0.31    | 0.1000 |
| 9  | Body mass index         | 0.31    | 0.1000 |
| 10 | RBC distribution width  | 0.29    | 0.3000 |
| 11 | Forced vital capacity   | 0.27    | 0.1000 |
| 12 | Eosinophil count        | 0.27    | 0.1000 |
| 13 | White blood cell count  | 0.27    | 0.1000 |
| 14 | Systolic Blood pressure | 0.27    | 0.3000 |
| 15 | Tanning ability         | 0.23    | 0.3000 |
| 16 | Waist hip ratio         | 0.21    | 0.1000 |
| 17 | College Education       | 0.20    | 0.3000 |
| 18 | Hypertension            | 0.18    | 0.1000 |
| 19 | Cardiovascular Diseases | 0.16    | 0.1000 |
| 20 | Morning Person          | 0.14    | 0.1000 |
| 21 | Eczema                  | 0.12    | 0.1000 |

**Supplementary Table 21: Model parameter values for AnnoPred applied to 21 UK Biobank traits.** We report the  $h_g^2$  estimate (from BOLT-LMM v2.3) and the optimal value of  $p$ , the proportion of causal variants in the AnnoPred model.



| Trait                      | $h_g^2$ | LDpred-funct-inf | Validation sample size |        |        |        |        |
|----------------------------|---------|------------------|------------------------|--------|--------|--------|--------|
|                            |         |                  | 1000                   | 2000   | 5000   | 10000  | ALL    |
| 1 Height                   | 0.57    | 0.4003           | 0.3970                 | 0.4048 | 0.4108 | 0.4122 | 0.4131 |
| 2 Hair color               | 0.45    | 0.2638           | 0.2957                 | 0.3010 | 0.3052 | 0.3081 | 0.3258 |
| 3 Platelet count           | 0.40    | 0.2290           | 0.2469                 | 0.2425 | 0.2451 | 0.2432 | 0.2428 |
| 4 Bone mineral density     | 0.40    | 0.2107           | 0.2350                 | 0.2300 | 0.2274 | 0.2242 | 0.2227 |
| 5 Balding type I           | 0.32    | 0.1078           | 0.1280                 | 0.1227 | 0.1233 | 0.1233 | 0.1237 |
| 6 Red blood cell count     | 0.32    | 0.1568           | 0.1692                 | 0.1643 | 0.1678 | 0.1642 | 0.1652 |
| 7 Age at menarche          | 0.31    | 0.1054           | 0.1143                 | 0.1128 | 0.1121 | 0.1114 | 0.1078 |
| 8 FEV1 FVC ratio           | 0.31    | 0.1289           | 0.1365                 | 0.1357 | 0.1327 | 0.1348 | 0.1317 |
| 9 Body mass index          | 0.31    | 0.1491           | 0.1530                 | 0.1477 | 0.1522 | 0.1520 | 0.1481 |
| 10 RBC distribution width  | 0.29    | 0.1394           | 0.1513                 | 0.1458 | 0.1528 | 0.1546 | 0.1496 |
| 11 Forced vital capacity   | 0.27    | 0.1153           | 0.1265                 | 0.1165 | 0.1118 | 0.1123 | 0.1147 |
| 12 Eosinophil count        | 0.27    | 0.1342           | 0.1464                 | 0.1415 | 0.1416 | 0.1432 | 0.1410 |
| 13 White blood cell count  | 0.27    | 0.1244           | 0.1325                 | 0.1280 | 0.1284 | 0.1288 | 0.1274 |
| 14 Systolic Blood pressure | 0.27    | 0.1135           | 0.1200                 | 0.1109 | 0.1141 | 0.1109 | 0.1136 |
| 15 Tanning ability         | 0.23    | 0.1219           | 0.1521                 | 0.1582 | 0.1786 | 0.1796 | 0.1788 |
| 16 Waist hip ratio         | 0.21    | 0.0786           | 0.0919                 | 0.0842 | 0.0822 | 0.0801 | 0.0806 |
| 17 College Education       | 0.20    | 0.0770           | 0.0775                 | 0.0771 | 0.0739 | 0.0717 | 0.0792 |
| 18 Hypertension            | 0.18    | 0.0527           | 0.0554                 | 0.0572 | 0.0542 | 0.0528 | 0.0523 |
| 19 Cardiovascular Diseases | 0.16    | 0.0432           | 0.0494                 | 0.0486 | 0.0432 | 0.0428 | 0.0429 |
| 20 Morning Person          | 0.14    | 0.0413           | 0.0417                 | 0.0427 | 0.0383 | 0.0366 | 0.0409 |
| 21 Eczema                  | 0.12    | 0.0279           | 0.0335                 | 0.0313 | 0.0290 | 0.0276 | 0.0284 |
| 22 Average across traits   | 0.29    | 0.1343           | 0.1454                 | 0.1430 | 0.1440 | 0.1435 | 0.1443 |

**Supplementary Table 22: Sensitivity of LDpred-funct results to number of validation samples across 21 UK Biobank traits.** We report results with the number of validation samples set to 1,000, 2,000, 5,000, 10,000 (the number of regularization bins is proportional to the number of validation samples; see Equation 6. Results are averaged across 100 random subsets of each size. ALL denotes results of LDpred-funct using the total number of validation samples (reported in Table Supplementary Table 11). We also report results for LDpred-funct-inf, which is equivalent to LDpred-funct in the limit of a very small number of validation samples.

|    | Phenotype               | $h_g^2$ | LDpred-funct-inf | LDpred-funct | LDpred-funct<br>(1K regularization weights) |
|----|-------------------------|---------|------------------|--------------|---------------------------------------------|
| 1  | Height                  | 0.57    | 0.4003           | 0.4131       | 0.4130                                      |
| 2  | Hair color              | 0.45    | 0.2638           | 0.3258       | 0.3258                                      |
| 3  | Platelet count          | 0.40    | 0.2290           | 0.2428       | 0.2427                                      |
| 4  | Bone mineral density    | 0.40    | 0.2107           | 0.2227       | 0.2226                                      |
| 5  | Balding type I          | 0.32    | 0.1078           | 0.1237       | 0.1238                                      |
| 6  | Red blood cell count    | 0.32    | 0.1568           | 0.1652       | 0.1653                                      |
| 7  | Age at menarche         | 0.31    | 0.1054           | 0.1078       | 0.1080                                      |
| 8  | FEV1 FVC ratio          | 0.31    | 0.1289           | 0.1317       | 0.1317                                      |
| 9  | Body mass index         | 0.31    | 0.1491           | 0.1481       | 0.1480                                      |
| 10 | RBC distribution width  | 0.29    | 0.1394           | 0.1496       | 0.1497                                      |
| 11 | Forced vital capacity   | 0.27    | 0.1153           | 0.1147       | 0.1147                                      |
| 12 | Eosinophil count        | 0.27    | 0.1342           | 0.1410       | 0.1410                                      |
| 13 | White blood cell count  | 0.27    | 0.1244           | 0.1274       | 0.1274                                      |
| 14 | Systolic Blood pressure | 0.27    | 0.1135           | 0.1136       | 0.1136                                      |
| 15 | Tanning ability         | 0.23    | 0.1219           | 0.1788       | 0.1787                                      |
| 16 | Waist hip ratio         | 0.21    | 0.0786           | 0.0806       | 0.0806                                      |
| 17 | College Education       | 0.20    | 0.0770           | 0.0792       | 0.0793                                      |
| 18 | Hypertension            | 0.18    | 0.0527           | 0.0523       | 0.0524                                      |
| 19 | Cardiovascular Diseases | 0.16    | 0.0432           | 0.0429       | 0.0429                                      |
| 20 | Morning Person          | 0.14    | 0.0413           | 0.0409       | 0.0410                                      |
| 21 | Eczema                  | 0.12    | 0.0279           | 0.0284       | 0.0284                                      |
| 22 | Average across traits   | 0.29    | 0.1343           | 0.1443       | 0.1443                                      |

**Supplementary Table 23: Sensitivity of LDpred-funct results to using only 1,000 samples to estimate regularization weights across 21 UK Biobank traits.** We report results using only 1K of the 22K validation samples to estimate regularization weights and the remaining validation samples to compute predictions.

|    | Phenotype               | 409K training samples | 404K training samples | difference | S.E.   | P-value |
|----|-------------------------|-----------------------|-----------------------|------------|--------|---------|
| 1  | Height                  | 0.4131                | 0.4132                | -0.0001    | 0.0216 | 0.9963  |
| 2  | Hair color              | 0.3258                | 0.3196                | 0.0062     | 0.1830 | 0.9734  |
| 3  | Platelet count          | 0.2428                | 0.2451                | -0.0023    | 0.0248 | 0.9261  |
| 4  | Bone mineral density    | 0.2227                | 0.2231                | -0.0004    | 0.0212 | 0.9812  |
| 5  | Balding type I          | 0.1237                | 0.1222                | 0.0015     | 0.0146 | 0.9127  |
| 6  | Red blood cell count    | 0.1652                | 0.1676                | -0.0024    | 0.0196 | 0.9066  |
| 7  | Age at menarche         | 0.1078                | 0.1071                | 0.0007     | 0.0120 | 0.9535  |
| 8  | FEV1 FVC ratio          | 0.1317                | 0.1310                | 0.0007     | 0.0122 | 0.9542  |
| 9  | Body mass index         | 0.1481                | 0.1477                | 0.0004     | 0.0085 | 0.9625  |
| 10 | RBC distribution width  | 0.1496                | 0.1488                | 0.0008     | 0.0171 | 0.9627  |
| 11 | Forced vital capacity   | 0.1147                | 0.1144                | 0.0003     | 0.0081 | 0.9705  |
| 12 | Eosinophil count        | 0.1410                | 0.1389                | 0.0021     | 0.0154 | 0.8915  |
| 13 | White blood cell count  | 0.1274                | 0.1278                | -0.0004    | 0.0097 | 0.9671  |
| 14 | Systolic Blood pressure | 0.1136                | 0.1134                | 0.0002     | 0.0076 | 0.9790  |
| 15 | Tanning ability         | 0.1788                | 0.1822                | -0.0034    | 0.1079 | 0.9749  |
| 16 | Waist hip ratio         | 0.0806                | 0.0799                | 0.0007     | 0.0066 | 0.9276  |
| 17 | College Education       | 0.0792                | 0.0784                | 0.0008     | 0.0066 | 0.9035  |
| 18 | Hypertension            | 0.0523                | 0.0527                | -0.0004    | 0.0046 | 0.9307  |
| 19 | Cardiovascular Diseases | 0.0429                | 0.0426                | 0.0003     | 0.0038 | 0.9580  |
| 20 | Morning Person          | 0.0409                | 0.0404                | 0.0005     | 0.0037 | 0.8925  |
| 21 | Eczema                  | 0.0284                | 0.0288                | -0.0004    | 0.0036 | 0.9336  |
| 22 | Average across traits   | 0.1443                | 0.1440                | 0.0003     | 0.0142 | 0.9831  |

**Supplementary Table 24: Sensitivity of LDpred-funct results to using 5,000 samples removed from the set of training samples to estimate regularization weights across 21 UK Biobank traits.** We report results using 5K samples omitted from the set of training samples (now reduced to 404K) to estimate regularization weights and the full set of 22K validation samples to compute predictions. Across 21 UK Biobank traits, we observed a 0.2% decrease in average prediction  $R^2$  (0.1440 vs. 0.1443), and the decrease was not statistically significant (P=0.98 for difference using one-sided z-test based on block-jackknife standard error).

|    | Trait                       | $h_g^2$ | P+T    | LDpred | SBayesR | P+T-funct-<br>LASSO | AnnoPred | LDpred<br>-funct-inf | LDpred<br>-funct |
|----|-----------------------------|---------|--------|--------|---------|---------------------|----------|----------------------|------------------|
| 1  | Height                      | 0.575   | 0.2228 | 0.7595 | 1.0335  | 0.3034              | 0.7374   | 0.7367               | 0.9938           |
| 2  | Hair color                  | 0.446   | 0.2505 | 0.7254 | 0.9909  | 0.3058              | 0.7118   | 0.7182               | 0.9920           |
| 3  | Platelet count              | 0.401   | 0.2429 | 0.8451 | 0.9645  | 0.3423              | 0.7678   | 0.8115               | 0.9895           |
| 4  | Bone mineral<br>density     | 0.398   | 0.2871 | 0.8192 | 0.9604  | 0.3477              | 0.8142   | 0.8246               | 0.9865           |
| 5  | Balding type I              | 0.323   | 0.3693 | 0.8994 | 1.9855  | 0.5050              | 0.8034   | 0.8781               | 0.9776           |
| 6  | Red blood cell<br>count     | 0.319   | 0.2898 | 0.8583 | 0.9721  | 0.3458              | 0.8481   | 0.8202               | 0.9822           |
| 7  | Age at menar-<br>che        | 0.313   | 0.1990 | 1.0227 | 0.6183  | 0.3430              | 0.8880   | 0.8706               | 0.9782           |
| 8  | FEV1 FVC ra-<br>tio         | 0.309   | 0.3021 | 0.8843 | 1.0014  | 0.3593              | 0.8591   | 0.8527               | 0.9740           |
| 9  | Body mass in-<br>dex        | 0.307   | 0.1687 | 0.9138 | 1.0338  | 0.3541              | 0.8839   | 0.8599               | 0.9813           |
| 10 | RBC distribu-<br>tion width | 0.286   | 0.2839 | 0.8399 | 0.9454  | 0.4189              | 0.8287   | 0.8123               | 0.9833           |
| 11 | Forced vital ca-<br>pacity  | 0.274   | 0.2237 | 0.9085 | 1.0890  | 0.3783              | 0.9106   | 0.8665               | 0.9770           |
| 12 | Eosinophil<br>count         | 0.274   | 0.2781 | 0.9082 | 0.9874  | 0.3298              | 0.8167   | 0.8518               | 0.9830           |
| 13 | White blood cell<br>count   | 0.273   | 0.2352 | 0.9033 | 1.0254  | 0.3707              | 0.8347   | 0.8538               | 0.9793           |
| 14 | Systolic Blood<br>pressure  | 0.267   | 0.2200 | 0.9050 | 1.0063  | 0.3637              | 0.9064   | 0.8453               | 0.9808           |
| 15 | Tanning ability             | 0.235   | 0.2437 | 0.8312 | 1.8516  | 0.2873              | 0.7384   | 0.8292               | 0.9905           |
| 16 | Waist hip ratio             | 0.210   | 0.2057 | 0.8453 | 0.9891  | 0.3344              | 0.8404   | 0.8500               | 0.9758           |
| 17 | College Educa-<br>tion      | 0.198   | 0.1345 | 1.0159 | 2.2891  | 0.2610              | 0.8747   | 0.8520               | 0.9728           |
| 18 | Hypertension                | 0.179   | 0.2140 | 0.9817 | 2.1853  | 0.3557              | 0.8328   | 0.8077               | 0.9710           |
| 19 | Cardiovascular<br>Diseases  | 0.160   | 0.1213 | 0.9376 | 2.1111  | 0.3296              | 0.8329   | 0.7953               | 0.9643           |
| 20 | Morning Person              | 0.137   | 0.2158 | 1.0803 | 2.1999  | 0.3720              | 0.9299   | 0.8751               | 0.9651           |
| 21 | Eczema                      | 0.118   | 0.1752 | 0.7496 | 2.1296  | 0.4971              | 0.8271   | 0.7611               | 0.9634           |
| 22 | Average across<br>traits    | 0.286   | 0.2325 | 0.8873 | 1.3509  | 0.3574              | 0.8327   | 0.8273               | 0.9791           |

**Supplementary Table 25: Calibration comparison for the 7 methods applied to 21 UK Biobank traits.** We report calibration slopes for each method, where a value close to 1 represents a well calibrated prediction.

|    | Trait                   | LDpred-funct-inf | LDpred-funct-10 | LDpred-funct-20 | LDpred-funct-50 | LDpred-funct-75 | LDpred-funct-100 |
|----|-------------------------|------------------|-----------------|-----------------|-----------------|-----------------|------------------|
| 1  | Height                  | 0.4003           | 0.4113          | 0.4116          | 0.4126          | 0.4127          | 0.4128           |
| 2  | Hair color              | 0.2624           | 0.2998          | 0.3059          | 0.3174          | 0.3199          | 0.3290           |
| 3  | Platelet count          | 0.2315           | 0.2445          | 0.2453          | 0.2445          | 0.2446          | 0.2448           |
| 4  | Bone mineral density    | 0.2137           | 0.2266          | 0.2266          | 0.2271          | 0.2265          | 0.2256           |
| 5  | Balding type I          | 0.1075           | 0.1217          | 0.1235          | 0.1220          | 0.1198          | 0.1185           |
| 6  | Red blood cell count    | 0.1571           | 0.1651          | 0.1655          | 0.1660          | 0.1660          | 0.1649           |
| 7  | Age at menarche         | 0.1082           | 0.1118          | 0.1116          | 0.1122          | 0.1112          | 0.1070           |
| 8  | FEV1 FVC ratio          | 0.1311           | 0.1353          | 0.1348          | 0.1343          | 0.1336          | 0.1315           |
| 9  | Body mass index         | 0.1508           | 0.1501          | 0.1504          | 0.1494          | 0.1481          | 0.1473           |
| 10 | RBC distribution width  | 0.1421           | 0.1527          | 0.1535          | 0.1535          | 0.1530          | 0.1517           |
| 11 | Forced vital capacity   | 0.1145           | 0.1160          | 0.1155          | 0.1145          | 0.1128          | 0.1118           |
| 12 | Eosinophil count        | 0.1335           | 0.1425          | 0.1422          | 0.1415          | 0.1406          | 0.1395           |
| 13 | White blood cell count  | 0.1239           | 0.1278          | 0.1284          | 0.1276          | 0.1266          | 0.1261           |
| 14 | Systolic Blood pressure | 0.1114           | 0.1129          | 0.1119          | 0.1118          | 0.1108          | 0.1105           |
| 15 | Tanning ability         | 0.1229           | 0.1716          | 0.1794          | 0.1818          | 0.1873          | 0.1892           |
| 16 | Waist hip ratio         | 0.0793           | 0.0818          | 0.0810          | 0.0804          | 0.0798          | 0.0782           |
| 17 | College Education       | 0.0716           | 0.0720          | 0.0731          | 0.0731          | 0.0748          | 0.0739           |
| 18 | Hypertension            | 0.0523           | 0.0542          | 0.0541          | 0.0528          | 0.0521          | 0.0519           |
| 19 | Cardiovascular Diseases | 0.0423           | 0.0437          | 0.0433          | 0.0421          | 0.0410          | 0.0410           |
| 20 | Morning Person          | 0.0372           | 0.0372          | 0.0366          | 0.0359          | 0.0349          | 0.0340           |
| 21 | Eczema                  | 0.0274           | 0.0278          | 0.0275          | 0.0271          | 0.0274          | 0.0258           |
| 22 | Average across traits   | 0.1343           | 0.1432          | 0.1439          | 0.1442          | 0.1440          | 0.1436           |

**Supplementary Table 26: Sensitivity of LDpred-funct results to number of bins used for regularization across 21 UK Biobank traits.** We report results with the number of posterior mean causal effect size bins used for regularization ( $K$ ) set to 10, 20, 50, 75 or 100. LDpred-funct- $K$  denotes each respective value of  $K$ . We also report results for LDpred-funct-inf, which is identical to LDpred-funct with  $K$  set to 1.

| Data Set                                | Training $N$ | P+T    | LDpred | P+T-funct<br>-LASSO | AnnoPred | LDpred-funct-inf | LDpred-funct |
|-----------------------------------------|--------------|--------|--------|---------------------|----------|------------------|--------------|
| UK Biobank interim release              | 113660       | 0.2289 | 0.2265 | 0.2609              | 0.2530   | 0.2465           | 0.2506       |
| UK Biobank                              | 408092       | 0.3448 | 0.3823 | 0.3644              | 0.4063   | 0.4010           | 0.4152       |
| 23andMe                                 | 698430       | 0.2997 | 0.2953 | 0.3141              | 0.3166   | 0.3203           | 0.3442       |
| Meta-analysis of UK Biobank and 23andMe | 1107430      | 0.3710 | 0.3990 | 0.3778              | 0.4189   | 0.4193           | 0.4310       |
| Fixed-effect meta-analysis              | 1107430      | 0.3687 | 0.3688 | 0.3663              | 0.3982   | 0.3991           | 0.4142       |

**Supplementary Table 27: Accuracy of 6 prediction methods in height meta-analysis of UK Biobank and 23andMe cohorts.** We report results for P+T, LDpred, P+T-funct-LASSO, AnnoPred, LDpred-funct-inf and LDpred-funct, for each of 4 training data sets: UK Biobank interim release (113,660 training samples), UK Biobank (408,092 training samples), 23andMe (698,430 training samples) and meta-analysis of UK Biobank and 23andMe (1,107,430 training samples). We also report results for a fixed-effect meta-analysis of UK Biobank and 23andMe. For SBayesR we obtained prediction  $R^2$  of 0.0219, 0.3829, 0.2658, 0.3967 and 0.3028 respectively for the 5 data sets listed. For the UK Biobank interim release analysis, we obtained prediction  $R^2$  of 0.0219 and  $h_g^2 = 0.054$ , perhaps because the algorithm failed to converge.

| Method           | South Asians    | Africans        |
|------------------|-----------------|-----------------|
| Method           | Avg $R^2$       | Avg $R^2$       |
| P+T              | 0.0568 (0.0022) | 0.0172 (0.0014) |
| LDpred           | 0.0666 (0.0031) | 0.0241 (0.0018) |
| SBayesR          | 0.0724 (0.0032) | 0.0250 (0.0019) |
| P+T-funct-LASSO  | 0.0631(0.0025)  | 0.0185 (0.0016) |
| AnnoPred         | 0.0744 (0.0032) | 0.0282 (0.0036) |
| LDpred-funct-inf | 0.0704 (0.0029) | 0.0263 (0.0019) |
| LDpred-funct     | 0.0727 (0.0030) | 0.0296 (0.0019) |

**Supplementary Table 28: Average prediction accuracy of 7 polygenic prediction methods in individuals of South Asian and African ancestry across 21 UK Biobank traits applied.** We report the average prediction  $R^2$  of each method in each population (block-jackknife s.e. in parentheses). We analyzed training samples of British ancestry from UK Biobank (average N=373K). We analyzed 7,444 unrelated South Asian validation samples from UK Biobank (74% Indian, 23% Pakistani, 3% Bangladeshi) and 7,379 unrelated African validation samples from UK Biobank (55% Caribbean, 45% African). In the South Asian validation sample, LDpred-funct attained +9.2%, +0.5%, -2.3%, +3.3% relative improvements in average prediction  $R^2$  vs. LDpred, SBayesR, AnnoPred, LDpred-funct-inf respectively;  $P < 5 * 10^{-5}$ ,  $P = 0.8$ ,  $P = 0.34$ ,  $P < 7 * 10^{-5}$  for differences using two-sided z-test based on block-jackknife s.e. In the African validation sample, LDpred-funct attained +23%, +18%, +5.0%, +13% relative improvements in average prediction  $R^2$  vs. LDpred, SBayesR, AnnoPred, LDpred-funct-inf respectively;  $P < 10^{-5}$ ,  $P < 2 * 10^{-3}$ ,  $P = 0.2$ ,  $P < 2 * 10^{-5}$  for differences using two-sided z-test based on block-jackknife s.e.

| Trait                      | $h_g^2$ | LDpred-funct-inf under different priors: |                    |                           |
|----------------------------|---------|------------------------------------------|--------------------|---------------------------|
|                            |         | baselineLD (1000G)                       | baselineLD (UK10K) | baselineLD + LDAK (UK10K) |
| 1 Height                   | 0.575   | 0.4003                                   | 0.4022             | 0.4046                    |
| 2 Hair color               | 0.446   | 0.2638                                   | 0.2778             | 0.2727                    |
| 3 Platelet count           | 0.401   | 0.2290                                   | 0.2291             | 0.2303                    |
| 4 Bone mineral density     | 0.398   | 0.2107                                   | 0.2109             | 0.2108                    |
| 5 Balding type I           | 0.323   | 0.1078                                   | 0.1065             | 0.1082                    |
| 6 Red blood cell count     | 0.319   | 0.1568                                   | 0.1571             | 0.1551                    |
| 7 Age at menarche          | 0.313   | 0.1054                                   | 0.1052             | 0.1051                    |
| 8 FEV1 FVC ratio           | 0.309   | 0.1289                                   | 0.1284             | 0.1286                    |
| 9 Body mass index          | 0.307   | 0.1491                                   | 0.1498             | 0.1484                    |
| 10 RBC distribution width  | 0.286   | 0.1394                                   | 0.1408             | 0.1404                    |
| 11 Eosinophil count        | 0.274   | 0.1342                                   | 0.1350             | 0.1348                    |
| 12 Forced vital capacity   | 0.274   | 0.1153                                   | 0.1150             | 0.1139                    |
| 13 White blood cell count  | 0.273   | 0.1244                                   | 0.1254             | 0.1249                    |
| 14 Systolic Blood pressure | 0.267   | 0.1135                                   | 0.1144             | 0.1141                    |
| 15 Tanning ability         | 0.235   | 0.1219                                   | 0.1227             | 0.1206                    |
| 16 Waist hip ratio         | 0.210   | 0.0786                                   | 0.0786             | 0.0785                    |
| 17 College Education       | 0.198   | 0.0770                                   | 0.0780             | 0.0777                    |
| 18 Hypertension            | 0.179   | 0.0527                                   | 0.0533             | 0.0536                    |
| 19 Cardiovascular Diseases | 0.160   | 0.0432                                   | 0.0434             | 0.0433                    |
| 20 Morning Person          | 0.137   | 0.0413                                   | 0.0414             | 0.0415                    |
| 21 Eczema                  | 0.118   | 0.0279                                   | 0.0289             | 0.0282                    |

**Supplementary Table 29: Accuracy of LDpred-funct-inf(1000G), LDpred-funct-inf(UK10K) and LDpred-funct-inf(UK10K, baseline-LD+LDAK) across 21 UK Biobank traits.** We report results for each trait. Results for Average across traits are reported in Supplementary Table 17.
